1 **Circulating miRNAs associated with bone mineral density in healthy adult baboons.**

2 Ellen. E. Quillen<sup>1</sup>, Jaydee Foster<sup>2</sup>, Anne Sheldrake<sup>2</sup>, Maggie Stainback<sup>1</sup>, Todd L. Bredbenner<sup>3</sup>

3 1. Department of Internal Medicine, Section of Molecular Medicine, Wake Forest School of  
4 Medicine

5 2. Department of Genetics, Texas Biomedical Research Institute

6 3. Department of 3 Mechanical and Aerospace Engineering, University of Colorado  
7 Colorado Springs

8

9 **Abstract**

10 MicroRNAs (miRNAs) regulate gene expression post-transcriptionally and circulate in  
11 the blood, making them attractive biomarkers of disease state for tissues like bone that are  
12 challenging to interrogate directly. Here we report on five miRNAs – miR-197-3p, miR-320a,  
13 miR-320b, miR-331-5p, and miR-423-5p – that are associated with bone mineral density (BMD)  
14 in 147 healthy adult baboons. These baboons range in age from 15 to 25 years (45 to 75 human  
15 equivalent years) and were 65% female with a broad range of BMDs including a minority of  
16 osteopenic individuals. miRNAs were generated via RNA sequencing from buffy coats collected  
17 at necropsy and areal BMD evaluated via DXA of the lumbar vertebrae post-mortem. Differential  
18 expression analysis controlled for the underlying pedigree structure of these animals to account  
19 for genetic variation which may be driving miRNA abundance and BMD values. While many of  
20 these miRNAs have been associated with risk of human osteoporosis, this finding is of interest  
21 because the cohort represent a model of normal aging and bone metabolism rather than a  
22 disease cohort. The replication of miRNA associations with osteoporosis or other bone  
23 metabolic disorders in animals with healthy BMD suggests an overlap in normal variation and  
24 disease states. We suggest that these miRNAs are involved in the regulation of cellular  
25 proliferation, apoptosis, and protein composition in the extracellular matrix throughout life.  
26 However, age-related dysregulation of these systems may lead to disease causing associations  
27 of the miRNAs among individuals with clinically defined disease.

28

29 **Keywords:** bone mineral density, miRNA, non-human primate

30 Research interest in microRNAs (miRNAs) has exploded in the past decade with  
31 recognition of the potential for these small circulating RNAs to act as biomarkers of disease  
32 state or regulators of bone across cell types. As post-transcriptional regulators, these small non-  
33 coding RNAs are uniquely able to regulate gene expression in the cytoplasm and may travel  
34 among cells to do so. While a number of studies have focused on the potential of miRNAs as  
35 biomarkers for osteoporosis and fracture risk, little is known about the miRNAs in the context of  
36 normal variation in spinal bone mineral density (BMD) among healthy adults. Here we report on  
37 five circulating miRNAs that are associated with variation in BMD within the healthy range for  
38 middle-aged and older baboons.

39 The baboon is unique model for age-related bone loss, as it is closely related  
40 phylogenetically to humans, is relatively large bodied, and exhibits intracortical remodeling  
41 throughout life, unlike rodent models of skeletal aging. The adult bone remodeling and skeletal  
42 fracture properties of baboons are also more similar to humans than are other mid- to large-  
43 sized mammals (Wang, Mabrey, and Agrawal 1998; Brommage 2001). Like humans, baboons  
44 undergo postmenopausal bone loss and sex and age influence BMD (L Havill et al. 2003)  
45 leading to osteopenia in approximately 25% of older females (L. M. Havill et al. 2008).  
46 Furthermore, biomechanical properties directly relevant to fracture, including vertebral  
47 trabecular bone mechanical properties (LM Havill, Allen, and Bredbenner 2010), femoral cortical  
48 bone microstructure (L. Havill et al. 2008), and femoral bone shape (Hansen et al. 2009), are  
49 strongly heritable in the baboon, making pedigreed animals ideal for assessing the effects of  
50 genetic and non-genetic factors bone biomarkers to bone fragility (Cox et al. 2013).

51 We leveraged the unique anatomical and genetic features of the baboon to identify  
52 circulating miRNAs associated with BMD across a broad range of mildly osteopenic and healthy  
53 adult baboons while controlling for underlying genetic factors.

54

## 55 **Methods**

### 56 *Study Population*

57 We generated miRNA and BMD data for 147 middle-aged and older baboons (hybrid  
58 *Papio hamadryas* species) drawn from a larger pedigree of baboons housed at the Southwest  
59 National Primate Center and Texas Biomedical Research Institute (Vagtborg 1973). Animals  
60 were 65% female and ranged in age from 15 to 25 years of age which is the equivalent of  
61 approximately 45 to 75 human years (Figure 1).

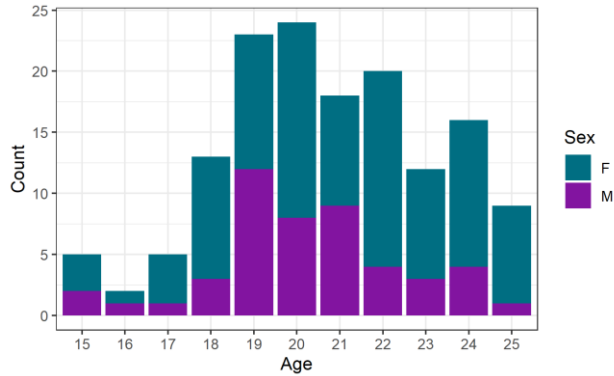

62

63 **Figure 1.** Distribution of animals by age and sex in sample.

64 During life, all animals were housed outdoors in large social group cages and maintained  
65 on commercial monkey chow to which they had ad libitum access. Animals with medical  
66 conditions known to influence bone metabolism (e.g. diabetes, chronic renal disease) or a  
67 history of traumatic fracture were excluded. No animals were sacrificed for this study, all were  
68 euthanized for other reasons and monitored by the Institutional Animal Care and Use  
69 Committee. Blood samples were drawn in EDTA tubes at necropsy and processed buffy coat  
70 stored at -80°C until RNA was extracted. Lumbar spines were stored at -20°C.

71 *DXA*

72 Dual-energy x-ray absorptiometry (DXA) scans were performed post-mortem on thawed  
73 lumbar vertebrae using a Lunar DPX 6529 (General Electric) and areal BMD analyzed with the  
74 manufacturer's software for adults. All analyzed values are for DXA measured for the anterior-  
75 posterior (AP) axis of L4-L2 vertebrae. Baboons exhibit high levels of sexual dimorphism in  
76 weight and body size leading to significant differences in mean BMD ( $0.22 \text{ g/cm}^2$ ,  $p = 1 \times 10^{-6}$ ,  
77 Figure 2). The distribution of BMD in these animals is consistent with previously published  
78 reference standards from more than 650 baboons (L Havill et al. 2003). Within the 10-year age  
79 range of our study, there is no significant decline in BMD. Nevertheless, the distribution of BMD  
80 across the sample is broad ranging from 4.3 standard deviations below to 8.4 standard  
81 deviations above the healthy, young adult mean for females and -3.5 to 9.3 standard deviation  
82 for males. To account for sexual dimorphism in BMD, we performed z-scoring on male and  
83 female BMD values separately and combined the scaled values for analysis.

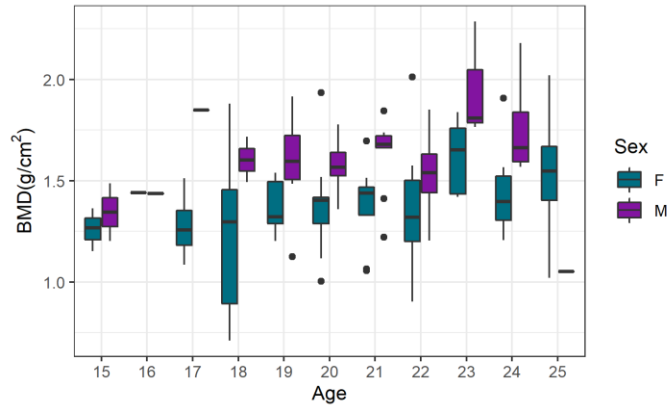

84

85 **Figure 2.** Distribution of BMD in study sample by age and sex.

### 86 *miRNA Sequencing and Analysis*

87 Total RNA was isolated from buffy coat using TRIzol (Invitrogen) and the Qiagen  
88 miRNeasy Mini Kit as described previously (Spradling et al. 2013). RNA quality was assessed  
89 using an Agilent Bioanalyzer 2100 and RNA was enriched for small non-coding RNAs  
90 (sncRNAs) by using the Ambion mirVana miRNA Isolation Kit. Complementary DNA (cDNA)  
91 libraries were generated with the Illumina Small RNA Prep Kit v1.5 following the manufacturer's  
92 protocol and sequenced in Illumina's Genome Analyzer (GAIIx) (Karere et al. 2012). mirDeep2  
93 (Mackowiak 2011) was used to align reads to the known human miRbase version 21 (Griffiths-  
94 Jones et al. 2008, 2006) mature and hairpin miRNAs and to identify novel miRNAs.

95 Raw miRNA counts were analyzed using the R statistical package DESeq2 to identify  
96 individual miRNAs associated with BMD (Love, Huber, and Anders 2014; R Core Team 2019).  
97 DESeq2 has the advantage of incorporating shrinkage estimators for dispersion and fold  
98 change which better handles low-abundance miRNAs compared to other methods. After z-  
99 scoring, weight and age were no longer associated with BMD and so were not included as  
100 covariates. miRNAs significantly associated with BMD at a FDR < 0.05 were further tested to  
101 determine if this association was driven by underlying genetic variation in the pedigree. A  
102 likelihood ratio test was calculated to compare linear mixed effects models fit with lme4 in the  
103 coxme R package (Therneau 2020) with and without miRNA abundance as a fixed effect while  
104 including pedigree-based kinship as a random effect.

### 105 *miRNA Target Prediction*

106 A major challenge in understanding the potential functional role of miRNAs is that most  
107 are computationally predicted to bind dozens of different mRNAs. To better predict what role

108 these circulating miRNAs could play in the bone, we used the R package multiMiR (Ru et al.  
109 2014) to query three experimentally validated miRNA target databases – miRecords (F. Xiao et  
110 al. 2009), miRTarBase (Hsu et al. 2011), and TarBase (Karagkouni et al. 2018). To be  
111 considered a potential target we required experimental validation of miRNA-mRNA interaction  
112 via luciferase, qRT-PCR, or Western blot experiments as well as the presence of the target  
113 protein in baboon bone (unpublished mass spectrometry data).

114

## 115 **Results**

### 116 *miRNAs Associations*

117 After FDR correction, 15 miRNAs were significantly associated with BMD in the DESeq2  
118 analysis of which 5 were associated (likelihood ratio test  $p < 0.1$ ) after correcting for the genetic  
119 relatedness of the animals (Table 1). All five of these highly associated miRNAs – miR-  
120 197-3p, miR-320a, miR-320b, miR-331-5p, and miR-423-5p – are negatively correlated with  
121 BMD (Figure 3) suggesting that increased levels of these miRNAs – which would be expected to  
122 decrease mRNA expression – are indicative of a decline in BMD. The heat map in Figure 4  
123 illustrates a high level of heterogeneity in miRNA abundance across animals with varying BMD.

124 **Table 2.** miRNAs significantly associated with BMD after FDR correction in DESeq2 analysis. Bolded  
125 miRNAs remained significantly associated after correction for pedigree structure.

|                       | $\beta$      | Mean Expression | $p$                                    | <i>LRT p</i> |
|-----------------------|--------------|-----------------|----------------------------------------|--------------|
| <b>hsa-miR-423-5p</b> | <b>-0.28</b> | <b>886</b>      | <b><math>2.4 \times 10^{-4}</math></b> | <b>0.03</b>  |
| <b>hsa-miR-320a</b>   | <b>-0.22</b> | <b>2,561</b>    | <b><math>3.9 \times 10^{-3}</math></b> | <b>0.04</b>  |
| hsa-miR-339-5p        | -0.19        | 1,697           | $6.2 \times 10^{-3}$                   | 0.22         |
| hsa-miR-3173-5p       | -0.38        | 16              | $3.0 \times 10^{-2}$                   | 0.14         |
| hsa-miR-371a-5p       | 0.6          | 7               | $3.0 \times 10^{-2}$                   | 0.40         |
| hsa-miR-16-2-3p       | -0.44        | 137             | $3.3 \times 10^{-2}$                   | 0.27         |
| <b>hsa-miR-197-3p</b> | <b>-0.18</b> | <b>577</b>      | <b><math>3.5 \times 10^{-2}</math></b> | <b>0.09</b>  |
| hsa-miR-21-5p         | 0.16         | 30,037          | $3.5 \times 10^{-2}$                   | 0.68         |
| <b>hsa-miR-331-5p</b> | <b>-0.09</b> | <b>808</b>      | <b><math>3.5 \times 10^{-2}</math></b> | <b>0.07</b>  |
| hsa-miR-374a-3p       | 0.26         | 231             | $3.5 \times 10^{-2}$                   | 0.88         |
| hsa-miR-374a-5p       | 0.19         | 4,255           | $3.5 \times 10^{-2}$                   | 0.92         |
| hsa-miR-424-3p        | -0.16        | 86              | $3.5 \times 10^{-2}$                   | 0.10         |
| hsa-miR-484           | -0.13        | 2,334           | $3.5 \times 10^{-2}$                   | 0.19         |
| <b>hsa-miR-320b</b>   | <b>-0.21</b> | <b>28</b>       | <b><math>3.6 \times 10^{-2}</math></b> | <b>0.05</b>  |
| hsa-miR-574-3p        | -0.16        | 94              | $4.1 \times 10^{-2}$                   | 0.25         |

126

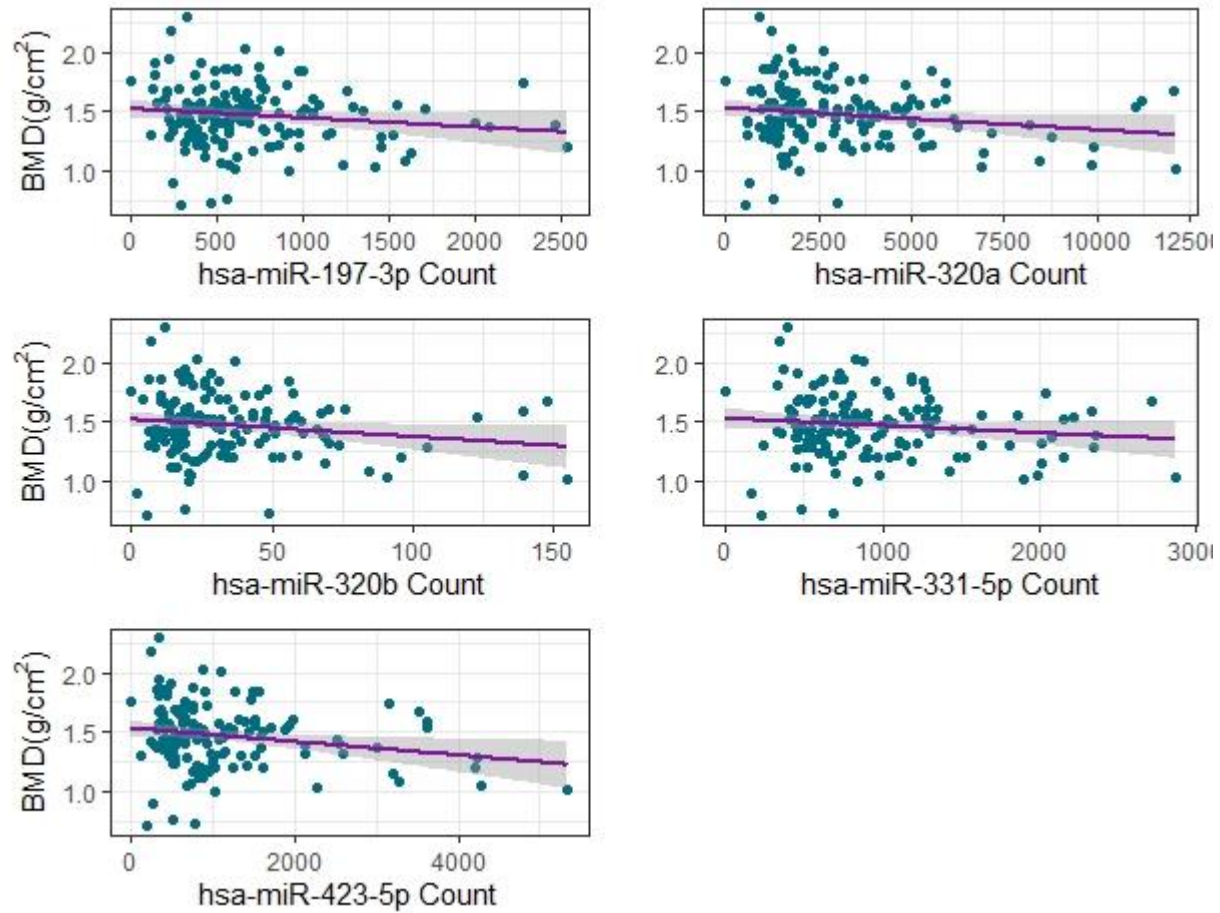

127

128 **Figure 3.** miRNA abundance versus BMD for significantly associated miRNAs.

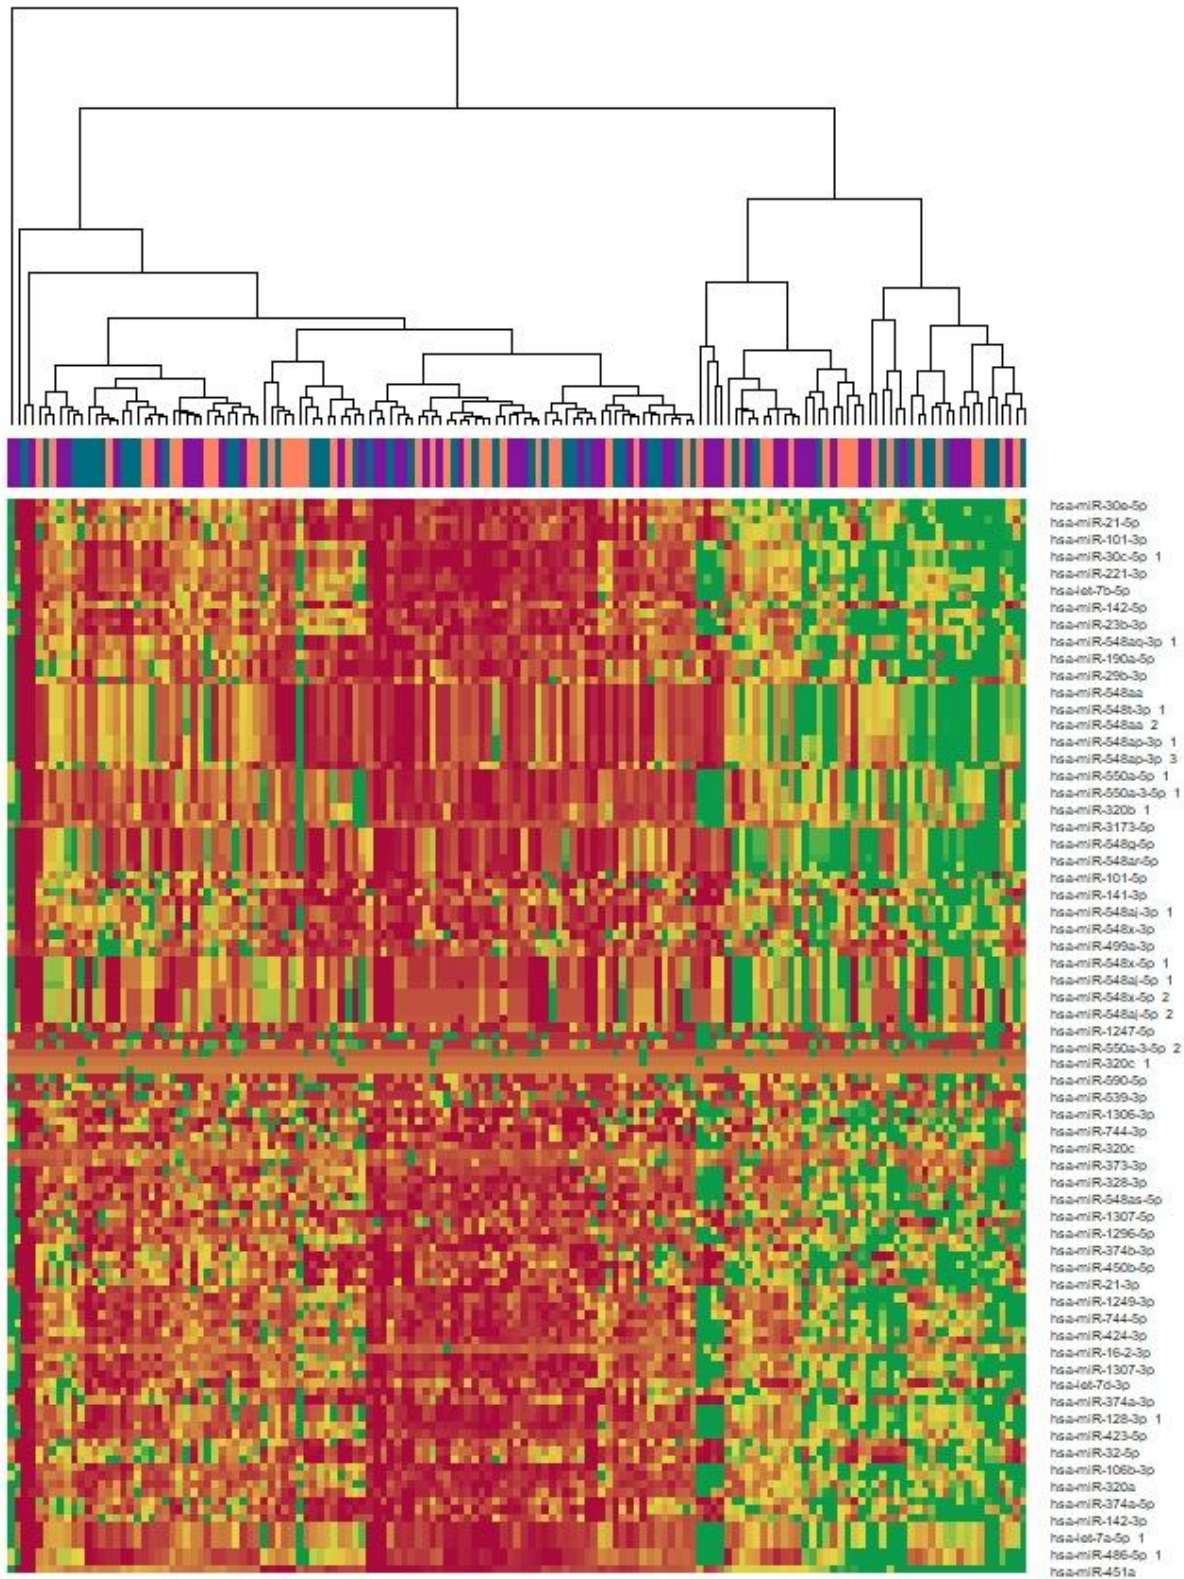

129

130 **Figure 4.** Heatmap of all miRNAs with nominal  $p < 0.05$  in DeSeq2. Columns are color-coded by z-scored  
131 BMD tertile with purple indicating the lowest tertile and teal the highest.

## 132 Putative miRNA targets

133 Based on our screening criteria, we identified 60 genes present in bone and  
134 experimentally validated as potential targets of our five significant miRNAs (Supplementary  
135 Table 1). Analysis in DAVID (Huang, Sherman, and Lempicki 2009) identified several  
136 significantly enriched functional annotations within the 60 genes. The top five enriched gene  
137 ontology terms representing more than 10% of the genes on the list are myelin sheath (26.4 fold  
138 enrichment, FDR =  $6.1 \times 10^{-10}$ ), focal adhesion (11.2 fold enrichment, FDR =  $2.9 \times 10^{-7}$ ),  
139 extracellular matrix (11.1 fold enrichment, FDR =  $3.6 \times 10^{-5}$ ), cadherin binding involved in cell-cell  
140 adhesion (9.5 fold enrichment, FDR =  $9.0 \times 10^{-4}$ ), cell-cell adherens junction (9.0 fold enrichment,  
141 FDR =  $5.4 \times 10^{-4}$ ). Additionally, these putative targets include seven genes previously linked to  
142 osteoporosis in genome wide association studies based on data drawn from the Public Health  
143 Genomics and Precision Health Knowledge Base (v7.1) (Yu et al. 2010) (Table 2).

144 **Table 2.** miRNA targets linked to osteoporosis in genome wide association studies

| GENE NAME     | MIRNA                            |
|---------------|----------------------------------|
| <b>FGB</b>    | hsa-miR-197-3p                   |
| <b>IGFBP5</b> | hsa-miR-197-3p                   |
| <b>SOD1</b>   | hsa-miR-197-3p                   |
| <b>SOD2</b>   | hsa-miR-197-3p<br>hsa-miR-331-5p |
| <b>GAPDH</b>  | hsa-miR-320a<br>hsa-miR-423-5p   |
| <b>MIF</b>    | hsa-miR-320a                     |
| <b>MMP9</b>   | hsa-miR-320a                     |

145

## 146 Discussion

147 Most previous research on bone density and miRNAs has focused on patients with  
148 osteoporosis or other disorders of bone metabolism. This is reflected in links between  
149 osteoporosis or fracture risk in human patients and the miRNAs we have identified, many of  
150 which have been suggested as potential clinical biomarkers.

151 Of the miRNAs we identified, literature linking the miRNA-320 family to bone fragility is  
152 the most robust. miR-320b is more common in women with a recent fracture compared to age-  
153 matched controls (Weilner et al. 2015). This may be due to its role in osteoblast differentiation.  
154 miR-320b over-expression prevents osteoblast differentiation, while inhibition promotes bone  
155 matrix mineralization and differentiation via BMP-2 (Laxman et al., 2017). Additionally,



156 researchers studying low-traumatic fractures in premenopausal, postmenopausal, and idiopathic  
157 osteoporosis patients found miR-320a was upregulated in these patients compared to controls  
158 (Kocijan et al., 2016). Prior analysis of trabecular bone tissue showed significant dysregulation  
159 of miR-320a in patients with osteoporosis, possibly via regulation of osteogenesis by targeting  
160 bone-forming genes such as *CTNNB1* (B-catenin) and *RUNX2* (De-Ugarte et al., 2015). These  
161 findings led to the inclusion of miR-320a on the commercially available OsteomiR panel  
162 (Tamirna).

163 Similarly, in a study of plasma miRNAs associated with fracture risk, miR-423-5p  
164 expression was significantly negatively associated with FRAX score, but not BMD, in  
165 osteoporosis patients (Bedene et al. 2016). This finding was reinforced by research on facial  
166 bone atrophy where miR-148-3p was shown to promote bone proliferation via prevention of  
167 apoptosis in mesenchymal stem cells (Yang et al. 2018). While there is little additional evidence  
168 of a role for this miRNA in bone, it has also been linked to regulation of apoptosis in  
169 cardiomyocytes (Zhu and Lu 2019), kidney cells (Yuan et al. 2017), retinal pigment epithelial  
170 cells (Q. Xiao et al. 2019), and colon cancer cells (Jia et al. 2018).

171 Circulating miR-331-5p levels have been identified as a potential biomarker for  
172 osteoporosis and subsequent bone fracture (Liu et al. 2015), although there is little known about  
173 the role of this miRNA in bone. Hints to its function come from studies of vascular smooth  
174 muscle cells, where miR-331-5p is induced by BMP2-PPAR $\gamma$  signaling to regulate cellular  
175 proliferation (Calvier et al. 2017). We predict a role for miR-331-5p in regulating *SOD2*  
176 expression which directly induces a BMP2 response under hypoxic conditions (Kamiya et al.  
177 2013).

178 While miR-197-3p has not previously been linked to adult bone metabolism, it was  
179 identified in the downregulation of osteogenesis in human amniotic membrane-derived  
180 mesenchymal stem cells due to its suppression of SMAD2 in the TGF- $\beta$  pathway during  
181 osteoblast differentiation (Avenidaño-Félix et al. 2019). We predict that miR-197-3p may target  
182 expression of both *SOD1* and *SOD2*, antioxidative enzymes that respond to vitamin D levels  
183 (Lisse 2020) and are thought to play a critical role in the regulation of cellular senescence  
184 (Zhang et al. 2017; Jeong and Cho 2015).

185 Taken together, our BMD-associated miRNAs and their putative targets point towards  
186 regulation of extracellular matrix proteins, apoptosis, and cell proliferation – three key  
187 components in the maintenance of bone homeostasis. Our findings demonstrate the overlap in

188 miRNAs associated with bone mineral density and related traits in humans and nonhuman  
189 primates, highlighting the utility of this model for understanding aging bone. The association of  
190 these miRNAs with variation in bone mineral density within the healthy, non-osteoporotic, range  
191 suggests they may be useful in identifying the earliest stages of metabolic shifts in bone. While  
192 the impact of epigenetic regulation of gene expression is evident in bone tissue, the use of  
193 miRNAs as biomarkers for low BMD and high fracture risk is still relatively new. It is apparent  
194 more research is needed to better understand these molecular pathways. Future work should  
195 focus on identifying the presence and functional role of these miRNAs in bone tissue to solidify  
196 their promise as biomarkers.

197

198

### 199 **Acknowledgements**

200 We thank Lorena Havill for her role in the development of this project. This work was funded by  
201 R01 AR064244 to TLB and K01 AG056663 to EEQ. The animals in the SNPRC pedigree were  
202 supported by grant P51 OD011133.

203

- 204 Avendaño-Félix, Mariana, Lizeth Fuentes-Mera, Rosalío Ramos-Payan, Maribel Aguilar-Medina,  
205 Vanessa Pérez-Silos, Nidia Moncada-Saucedo, Laurence A. Marchat, et al. 2019. “A Novel  
206 OsteomiRs Expression Signature for Osteoblast Differentiation of Human Amniotic  
207 Membrane-Derived Mesenchymal Stem Cells.” *BioMed Research International* 2019  
208 (March): 1–13. <https://doi.org/10.1155/2019/8987268>.
- 209 Bedene, Ajda, Simona Mencej Bedrač, Lea Ješe, Janja Marc, Peter Vrtačnik, Janez Preželj,  
210 Tomaž Kocjan, Tilen Kranjc, and Barbara Ostanek. 2016. “MiR-148a the Epigenetic  
211 Regulator of Bone Homeostasis Is Increased in Plasma of Osteoporotic Postmenopausal  
212 Women.” *Wiener Klinische Wochenschrift* 128: 519–26. [https://doi.org/10.1007/s00508-](https://doi.org/10.1007/s00508-016-1141-3)  
213 016-1141-3.
- 214 Brommage, R. 2001. “Perspectives on Using Nonhuman Primates to Understand the Etiology  
215 and Treatment of Postmenopausal Osteoporosis.” *Journal of Musculoskeletal & Neuronal*  
216 *Interactions* 1 (4): 307–25.
- 217 Calvier, Laurent, Philippe Chouvarine, Ekaterina Legchenko, Nadine Hoffmann, Jonas Geldner,  
218 Paul Borchert, Danny Jonigk, Miklos M. Mozes, and Georg Hansmann. 2017. “PPARγ  
219 Links BMP2 and TGFβ1 Pathways in Vascular Smooth Muscle Cells, Regulating Cell  
220 Proliferation and Glucose Metabolism.” *Cell Metabolism* 25 (5): 1118-1134.e7.  
221 <https://doi.org/10.1016/j.cmet.2017.03.011>.
- 222 Cox, Laura a, Anthony G Comuzzie, Lorena M Havill, Genesis M Karere, Kimberly D Spradling,  
223 Michael C Mahaney, Peter W Nathanielsz, et al. 2013. “Baboons as a Model to Study  
224 Genetics and Epigenetics of Human Disease.” *ILAR Journal / National Research Council,*  
225 *Institute of Laboratory Animal Resources* 54 (2): 106–21. <https://doi.org/10.1093/ilar/ilt038>.
- 226 Griffiths-Jones, Sam, Russell J Grocock, Stijn van Dongen, Alex Bateman, and Anton J Enright.  
227 2006. “MiRBase: MicroRNA Sequences, Targets and Gene Nomenclature.” *Nucleic Acids*  
228 *Research* 34 (Database issue): D140-4. <https://doi.org/10.1093/nar/gkj112>.
- 229 Griffiths-Jones, Sam, Harpreet Kaur Saini, Stijn van Dongen, and Anton J Enright. 2008.  
230 “MiRBase: Tools for MicroRNA Genomics.” *Nucleic Acids Research* 36 (Database issue):  
231 D154-8. <https://doi.org/10.1093/nar/gkm952>.
- 232 Hansen, Heather L, Todd L Bredbenner, Daniel P Nicoletta, Michael C Mahaney, and Lorena M  
233 Havill. 2009. “Cross-Sectional Geometry of the Femoral Midshaft in Baboons Is Heritable.”  
234 *Bone* 45 (5): 892–97. <https://doi.org/10.1016/j.bone.2009.05.028>.

- 235 Havill, L.M., S.M. Levine, D.E. Newman, and M.C. Mahaney. 2008. "Osteopenia and  
236 Osteoporosis in Adult Baboons (*Papio Hamadryas*)."  
237 *Journal of Medical Primatology* 37 (3): 146–53. <https://doi.org/10.1111/j.1600-0684.2007.00270.x>.
- 238 Havill, L.M, JAK Harris, S.M. Levine, and Michael C Mahaney. 2008. "Strong and Significant  
239 Genetic Effects on Osteonal Remodeling-Associated Cortical Bone Microstructure in  
240 Pedigreed Baboons." *Bone* 42 (Suppl 1): S53-54.
- 241 Havill, L, Michael C. Mahaney, Stefan a Czerwinski, K D Carey, K Rice, and Jeffrey Rogers.  
242 2003. "Bone Mineral Density Reference Standards in Adult Baboons (*Papio Hamadryas*)  
243 by Sex and Age." *Bone* 33 (6): 877–88. [https://doi.org/10.1016/S8756-3282\(03\)00231-X](https://doi.org/10.1016/S8756-3282(03)00231-X).
- 244 Havill, LM, MR Allen, and TL Bredbenner. 2010. "Heritability of Lumbar Trabecular Bone  
245 Mechanical Properties in Baboons." *Bone* 46 (3): 835–40.  
246 <https://doi.org/10.1016/j.bone.2009.11.002.Heritability>.
- 247 Hsu, Sheng-Da, Feng-Mao Lin, Wei-Yun Wu, Chao Liang, Wei-Chih Huang, Wen-Ling Chan,  
248 Wen-Ting Tsai, et al. 2011. "MiRTarBase: A Database Curates Experimentally Validated  
249 MicroRNA-Target Interactions." *Nucleic Acids Research* 39 (Database issue): D163-9.  
250 <https://doi.org/10.1093/nar/gkq1107>.
- 251 Huang, Da Wei, Brad T Sherman, and Richard a Lempicki. 2009. "Bioinformatics Enrichment  
252 Tools: Paths toward the Comprehensive Functional Analysis of Large Gene Lists." *Nucleic  
253 Acids Research* 37 (1): 1–13. <https://doi.org/10.1093/nar/gkn923>.
- 254 Jeong, Sin-Gu, and Goang-Won Cho. 2015. "Endogenous ROS Levels Are Increased in  
255 Replicative Senescence in Human Bone Marrow Mesenchymal Stromal Cells."  
256 *Biochemical and Biophysical Research Communications* 460 (4): 971–76.  
257 <https://doi.org/10.1016/j.bbrc.2015.03.136>.
- 258 Jia, Wenzhuo, Tao Yu, Qi An, Xianglong Cao, and Hongda Pan. 2018. "MicroRNA-423-5p  
259 Inhibits Colon Cancer Growth by Promoting Caspase-dependent Apoptosis." *Experimental  
260 and Therapeutic Medicine*, June. <https://doi.org/10.3892/etm.2018.6288>.
- 261 Kamiya, Nobuhiro, Sasha Shafer, Ila Oxendine, Douglas P. Mortlock, Ronald L. Chandler, Leif  
262 Oxburgh, and Harry K.W. Kim. 2013. "Acute BMP2 Upregulation Following Induction of  
263 Ischemic Osteonecrosis in Immature Femoral Head." *Bone* 53 (1): 239–47.  
264 <https://doi.org/10.1016/j.bone.2012.11.023>.

- 265 Karagkouni, Dimitra, Maria D Paraskevopoulou, Serafeim Chatzopoulos, Ioannis S Vlachos,  
266 Spyros Tastsoglou, Ilias Kanellos, Dimitris Papadimitriou, et al. 2018. "DIANA-TarBase v8:  
267 A Decade-Long Collection of Experimentally Supported MiRNA–Gene Interactions."  
268 *Nucleic Acids Research* 46 (D1): D239–45. <https://doi.org/10.1093/nar/gkx1141>.
- 269 Karere, Genesio M, Jeremy P Glenn, John L VandeBerg, and Laura A Cox. 2012. "Differential  
270 MicroRNA Response to a High-Cholesterol, High-Fat Diet in Livers of Low and High LDL-C  
271 Baboons." *BMC Genomics* 13 (July): 320. <https://doi.org/10.1186/1471-2164-13-320>.
- 272 Lisse, Thomas S. 2020. "Vitamin D Regulation of a SOD1-to-SOD2 Antioxidative Switch to  
273 Prevent Bone Cancer." *Applied Sciences* 10 (7): 2554.  
274 <https://doi.org/10.3390/app10072554>.
- 275 Liu, Yanqing, Yueqiu Wang, Nailong Yang, Suning Wu, Yanhua Lv, and Lili Xu. 2015. "In Silico  
276 Analysis of the Molecular Mechanism of Postmenopausal Osteoporosis." *Molecular  
277 Medicine Reports* 12 (5): 6584–90. <https://doi.org/10.3892/mmr.2015.4283>.
- 278 Love, Michael I, Wolfgang Huber, and Simon Anders. 2014. "Moderated Estimation of Fold  
279 Change and Dispersion for RNA-Seq Data with DESeq2." *Genome Biology* 15 (12): 550.  
280 <https://doi.org/10.1186/s13059-014-0550-8>.
- 281 Mackowiak, Sebastian D. 2011. "Identification of Novel and Known MiRNAs in Deep-  
282 Sequencing Data with MiRDeep2." *Current Protocols in Bioinformatics* 12 (12): 1–15.  
283 <https://doi.org/10.1002/0471250953.bi1210s36>.
- 284 R Core Team. 2019. "R: A Language and Environment for Statistical Computing." Vienna,  
285 Austria: R Foundation for Statistical Computing.
- 286 Ru, Yuanbin, Katerina J. Kechris, Boris Tabakoff, Paula Hoffman, Richard A. Radcliffe, Russell  
287 Bowler, Spencer Mahaffey, et al. 2014. "The MultiMiR R Package and Database:  
288 Integration of MicroRNA–Target Interactions along with Their Disease and Drug  
289 Associations." *Nucleic Acids Research* 42 (17): e133–e133.  
290 <https://doi.org/10.1093/nar/gku631>.
- 291 Spradling, Kimberly D, Jeremy P Glenn, Roy Garcia, Robert E Shade, and Laura A Cox. 2013.  
292 "The Baboon Kidney Transcriptome: Analysis of Transcript Sequence, Splice Variants, and  
293 Abundance." *PloS One* 8 (4): e57563. <https://doi.org/10.1371/journal.pone.0057563>.
- 294 Therneau, Terry M. 2020. "Coxme: Mixed Effects Cox Models."

- 295 Vagtborg, Harold. 1973. *The Story of the Southwest Research Center: A Private, Nonprofit,*  
296 *Scientific Research Adventure.* University of Texas at Austin.
- 297 Wan, Chengyao, Jing Wen, Xiaolin Liang, Qiongni Xie, Wenqi Wu, Meiqing Wu, and Zhenfang  
298 Liu. 2021. "Identification of MiR-320 Family Members as Potential Diagnostic and  
299 Prognostic Biomarkers in Myelodysplastic Syndromes." *Scientific Reports* 11 (1).  
300 <https://doi.org/10.1038/s41598-020-80571-z>.
- 301 Wang, X, J D Mabrey, and C M Agrawal. 1998. "An Interspecies Comparison of Bone Fracture  
302 Properties." *Bio-Medical Materials and Engineering* 8 (1): 1–9.
- 303 Weilner, Sylvia, Susanna Skalicky, Benjamin Salzer, Verena Keider, Michael Wagner, Florian  
304 Hildner, Christian Gabriel, et al. 2015. "Differentially Circulating MiRNAs after Recent  
305 Osteoporotic Fractures Can Influence Osteogenic Differentiation." *Bone* 79 (October): 43–  
306 51. <https://doi.org/10.1016/j.bone.2015.05.027>.
- 307 Xiao, Feifei, Zhixiang Zuo, Guoshuai Cai, Shuli Kang, Xiaolian Gao, and Tongbin Li. 2009.  
308 "MiRecords: An Integrated Resource for MicroRNA-Target Interactions." *Nucleic Acids*  
309 *Research* 37 (Database issue): D105-10. <https://doi.org/10.1093/nar/gkn851>.
- 310 Xiao, Qing, Yinu Zhao, Jia Xu, Wen-Jie Li, Yu Chen, and Hong-Jing Sun. 2019. "NFE2/MiR-  
311 423-5p/TFF1 Axis Regulates High Glucose-Induced Apoptosis in Retinal Pigment Epithelial  
312 Cells." *BMC Molecular and Cell Biology* 20 (1): 39. <https://doi.org/10.1186/s12860-019-0223-2>.
- 314 Yang, Sefei, J. U.N. Guo, L. E.I. Zhou, Helin Xing, Xianli Wang, and Chaofang Dong. 2018.  
315 "Mir-148b-3p, Mir-337-5p and Mir-423-5p Expression in Alveolar Ridge Atrophy and Their  
316 Roles in the Proliferation and Apoptosis of Ommscs." *Experimental and Therapeutic*  
317 *Medicine* 16 (6): 5334–42. <https://doi.org/10.3892/etm.2018.6850>.
- 318 Yu, W., M. Clyne, M. J. Houry, and M. Gwinn. 2010. "Phenopedia and Genopedia: Disease-  
319 Centered and Gene-Centered Views of the Evolving Knowledge of Human Genetic  
320 Associations." *Bioinformatics* 26 (1): 145–46. <https://doi.org/10.1093/bioinformatics/btp618>.
- 321 Yuan, Xiao-Peng, Long-Shan Liu, Chuan-Bao Chen, Jian Zhou, Yi-Tao Zheng, Xiao-Ping Wang,  
322 Ming Han, and Chang-Xi Wang. 2017. "MicroRNA-423-5p Facilitates  
323 Hypoxia/Reoxygenation-Induced Apoptosis in Renal Proximal Tubular Epithelial Cells by  
324 Targeting GSTM1 via Endoplasmic Reticulum Stress." *Oncotarget* 8 (47): 82064–77.  
325 <https://doi.org/10.18632/oncotarget.18289>.

- 326 Zhang, Yiqiang, Archana Unnikrishnan, Sathyaseelan S. Deepa, Yuhong Liu, Yan Li, Yuji Ikeno,  
327 Danuta Sosnowska, Holly Van Remmen, and Arlan Richardson. 2017. “A New Role for  
328 Oxidative Stress in Aging: The Accelerated Aging Phenotype in Sod1– Mice Is Correlated  
329 to Increased Cellular Senescence.” *Redox Biology* 11 (April): 30–37.  
330 <https://doi.org/10.1016/j.redox.2016.10.014>.
- 331 Zhu, Xin, and Xiaolan Lu. 2019. “MiR-423-5p Inhibition Alleviates Cardiomyocyte Apoptosis and  
332 Mitochondrial Dysfunction Caused by Hypoxia/Reoxygenation through Activation of the  
333 Wnt/B-catenin Signaling Pathway via Targeting MYBL2.” *Journal of Cellular Physiology*  
334 234 (12): 22034–43. <https://doi.org/10.1002/jcp.28766>.
- 335
